# Supplementary material for: Surface Chalking upon Weathering of Dark-Colored PVC Articles and Relevant Stabilizers
Source: MDPI journal article supplement (doi:10.3390/polym16081047), 2024-04-10
Supplement: s1 [file s1]

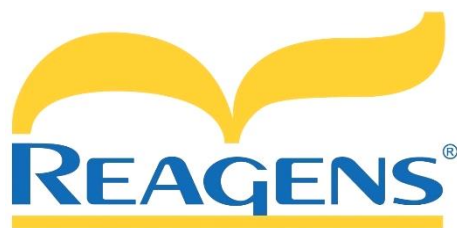

**TECHNICAL SERVICE LABORATORY**

**S. Giorgio di Piano, Bologna**

## **Article**

**Surface Chalking upon Weathering of Dark-Colored  
PVC**

**Articles and Relevant Stabilizers**

**Table S1. Outdoor weathering data**

| Sample | Parameter  | 0 months | 4 months | 6 months | 12 months | 18 months |
|--------|------------|----------|----------|----------|-----------|-----------|
| 1      | L*         | 32.27    | 35.62    | 36.48    | 38.04     | 38.9      |
| 1      | a*         | -8.16    | -9.32    | -9.91    | -11.59    | -13.89    |
| 1      | b*         | 0.81     | -0.29    | -0.43    | 0.6       | 0.58      |
| 1      | $\Delta E$ | 0        | 3.71     | 4.72     | 6.72      | 8.77      |
| 2      | L*         | 32.31    | 35.67    | 36.3     | 37.33     | 37.1      |
| 2      | a*         | -8.3     | -9.49    | -10.21   | -11.2     | -13.42    |
| 2      | b*         | 0.63     | -0.37    | -0.47    | 0.56      | 0.73      |
| 2      | $\Delta E$ | 0        | 3.70     | 4.56     | 5.80      | 7.01      |
| 3      | L*         | 32.24    | 35.07    | 36.51    | 37.16     | 36.13     |
| 3      | a*         | -8.11    | -9.39    | -9.92    | -10.54    | -13.56    |
| 3      | b*         | 0.63     | -0.32    | -0.39    | 0.46      | 0.8       |
| 3      | $\Delta E$ | 0        | 3.25     | 4.75     | 5.49      | 6.70      |
| 4      | L*         | 32.23    | 34.75    | 35.72    | 36.81     | 38.97     |
| 4      | a*         | -8.24    | -8.68    | -9.07    | -10.21    | -12.83    |
| 4      | b*         | 0.92     | 0.11     | -0.04    | 0.58      | 0.42      |
| 4      | $\Delta E$ | 0        | 2.68     | 3.71     | 5.00      | 8.17      |
| 5      | L*         | 33.05    | 33       | 34.42    | 35.02     | 36.4      |
| 5      | a*         | -8.1     | -8.88    | -8.91    | -9.54     | -10.39    |
| 5      | b*         | 0.66     | -0.03    | -0.09    | 0.24      | -0.33     |
| 5      | $\Delta E$ | 0        | 1.04     | 1.76     | 2.48      | 4.18      |
| 6      | L*         | 32.62    | 33.37    | 33.91    | 34.87     | 35.79     |
| 6      | a*         | -8.12    | -8.69    | -8.92    | -9.34     | -11.6     |
| 6      | b*         | 0.66     | 0.23     | 0.05     | 0.31      | 0.37      |
| 6      | $\Delta E$ | 0        | 1.04     | 1.64     | 2.58      | 4.72      |
| 9      | L*         | 32.41    | 34.89    | 35.74    | 36.73     | 38.52     |
| 9      | a*         | -8.27    | -8.78    | -9.25    | -10.41    | -12.97    |
| 9      | b*         | 0.78     | 0.02     | -0.12    | 0.48      | 0.49      |
| 9      | $\Delta E$ | 0        | 2.64     | 3.59     | 4.83      | 7.71      |

|    |            |       |       |        |        |        |
|----|------------|-------|-------|--------|--------|--------|
| 10 | L*         | 32.73 | 33.88 | 34.54  | 35.42  | 36.53  |
| 10 | a*         | -7.84 | -8.63 | -9.13  | -9.87  | -10.93 |
| 10 | b*         | 0.89  | 0.13  | 0.01   | 0.5    | 0.18   |
| 10 | $\Delta E$ | 0     | 1.59  | 2.39   | 3.39   | 4.95   |
| 11 | L*         | 32.29 | 32.45 | 33.08  | 34.3   | 34.54  |
| 11 | a*         | -7.84 | -8.74 | -8.89  | -9.3   | -9.47  |
| 11 | b*         | 0.87  | 0.28  | 0.1    | 0.31   | 0.03   |
| 11 | $\Delta E$ | 0     | 1.09  | 1.52   | 2.55   | 2.90   |
| 12 | L*         | 32.54 | 36.04 | 37.2   | 38.27  | 40.26  |
| 12 | a*         | -8.19 | -9.38 | -10.18 | -11.92 | -15.18 |
| 12 | b*         | 0.85  | -0.06 | -0.15  | 0.9    | 0.63   |
| 12 | $\Delta E$ | 0     | 3.81  | 5.16   | 6.84   | 10.42  |
| 13 | L*         | 32.29 | 35.6  | 36.59  | 37.88  | 40.68  |
| 13 | a*         | -8.14 | -8.89 | -9.68  | -11.13 | -15.13 |
| 13 | b*         | 0.85  | -0.06 | -0.22  | 0.64   | 0.66   |
| 13 | $\Delta E$ | 0     | 3.51  | 4.69   | 6.34   | 10.92  |
| 14 | L*         | 32.58 | 34.99 | 36.51  | 37.22  | 39.77  |
| 14 | a*         | -7.93 | -8.82 | -9.35  | -10.72 | -14.09 |
| 14 | b*         | 0.78  | -0.29 | -0.44  | 0.52   | 0.41   |
| 14 | $\Delta E$ | 0     | 2.78  | 4.35   | 5.42   | 9.48   |
| 18 | L*         | 32.88 | 36.2  | 37.25  | 38.44  | 37.23  |
| 18 | a*         | -8.12 | -9.49 | -10.43 | -11.92 | -12.43 |
| 18 | b*         | 0.85  | -0.06 | -0.21  | 0.88   | 0.47   |
| 18 | $\Delta E$ | 0     | 3.71  | 5.06   | 6.73   | 6.14   |
| 19 | L*         | 32.26 | 37.62 | 39.44  | 40.77  | 43.02  |
| 19 | a*         | -8.3  | -9.86 | -10.73 | -12.82 | -16.84 |
| 19 | b*         | 0.97  | -0.08 | -0.17  | 1.07   | 1.53   |
| 19 | $\Delta E$ | 0     | 5.68  | 7.67   | 9.64   | 13.75  |
| 20 | L*         | 32.47 | 37.88 | 39.5   | 41.81  | 40.89  |
| 20 | a*         | -8.38 | -9.7  | -10.57 | -12.59 | -14.75 |
| 20 | b*         | 0.85  | -0.14 | -0.43  | 0.72   | 0.87   |
| 20 | $\Delta E$ | 0     | 5.66  | 7.47   | 10.25  | 10.56  |

**Table S2. Xenon-arc tester data**

| Sample | Parameter  | 0 h   | 500 h | 1000 h | 1500 h | 2000 h | 2500 h | 3000 h | 3500 h | 4000 h |
|--------|------------|-------|-------|--------|--------|--------|--------|--------|--------|--------|
| 1      | L*         | 32.27 | 33.15 | 34.78  | 36.59  | 35.17  | 33.35  | 31.45  | 32.16  | 32.95  |
| 1      | a*         | -8.16 | -8.75 | -9.75  | -11.13 | -12.99 | -17.42 | -16.66 | -19.43 | -18.94 |
| 1      | b*         | 0.81  | 0.03  | 0.42   | 0.77   | 1.49   | 1.97   | 2.06   | 2.88   | 2.94   |
| 1      | $\Delta E$ | 0     | 1.32  | 3.00   | 5.24   | 5.67   | 9.39   | 8.63   | 11.46  | 11.01  |
| 2      | L*         | 32.31 | 33.63 | 36.38  | 34.73  | 34.03  | 33.65  | 32.87  | 32.57  | 33.15  |
| 2      | a*         | -8.3  | -8.66 | -10.15 | -9.97  | -13.44 | -15.57 | -17.66 | -18.44 | -18.85 |
| 2      | b*         | 0.63  | -0.07 | -0.19  | 0.64   | 0.82   | 1.16   | 1.67   | 2.2    | 2.65   |
| 2      | $\Delta E$ | 0     | 1.54  | 4.55   | 2.94   | 5.42   | 7.41   | 9.43   | 10.26  | 10.77  |
| 3      | L*         | 32.24 | 33.92 | 35.52  | 36.18  | 34.63  | 34.14  | 32.77  | 34.53  | 35.73  |
| 3      | a*         | -8.11 | -8.5  | -9.8   | -11.16 | -13.18 | -17.2  | -17.27 | -19.27 | -20.48 |
| 3      | b*         | 0.63  | 0.05  | 0.17   | 0.43   | 0.95   | 1.08   | 1.23   | 1.53   | 2.09   |
| 3      | $\Delta E$ | 0     | 1.82  | 3.72   | 4.99   | 5.61   | 9.30   | 9.19   | 11.43  | 12.94  |
| 4      | L*         | 32.23 | 33    | 34.81  | 36.27  | 36.71  | 34.31  | 31.26  | 32.84  | 32.77  |
| 4      | a*         | -8.24 | -8.53 | -9.37  | -10.32 | -11.44 | -17.08 | -17.13 | -19.88 | -18.89 |
| 4      | b*         | 0.92  | 0.37  | 0.45   | 0.67   | 1.21   | 1.93   | 2.3    | 3.08   | 3.4    |
| 4      | $\Delta E$ | 0     | 0.99  | 2.86   | 4.55   | 5.51   | 9.14   | 9.05   | 11.85  | 10.95  |
| 5      | L*         | 33.05 | 32.74 | 33.01  | 36.38  | 35.97  | 33.51  | 31.34  | 31.61  | 30.91  |
| 5      | a*         | -8.1  | -8.64 | -9.35  | -9.87  | -10.47 | -14.09 | -14.83 | -17.46 | -17.18 |
| 5      | b*         | 0.66  | 0.33  | 0.06   | 0.03   | 0.6    | 1.25   | 1.56   | 2.31   | 2.85   |
| 5      | $\Delta E$ | 0     | 0.70  | 1.39   | 3.82   | 3.76   | 6.04   | 7.00   | 9.61   | 9.58   |
| 6      | L*         | 32.62 | 33.17 | 33.79  | 35.66  | 35.35  | 33.3   | 30.79  | 31.25  | 30.12  |
| 6      | a*         | -8.12 | -8.41 | -9.02  | -9.81  | -10.84 | -13.89 | -15.2  | -16.97 | -16.85 |
| 6      | b*         | 0.66  | 0.37  | 0.29   | 0.22   | 0.66   | 1.15   | 1.68   | 2.08   | 2.6    |
| 6      | $\Delta E$ | 0     | 0.69  | 1.52   | 3.51   | 3.85   | 5.83   | 7.38   | 9.07   | 9.29   |
| 9      | L*         | 32.41 | 33.15 | 34.74  | 35.55  | 33.66  | 33.16  | 31.37  | 32.4   | 33.09  |
| 9      | a*         | -8.27 | -8.55 | -9.27  | -10.36 | -13.94 | -18.58 | -17.97 | -19.26 | -19.18 |
| 9      | b*         | 0.78  | 0.34  | 0.51   | 0.77   | 1.64   | 2.2    | 2.57   | 3.15   | 3.61   |
| 9      | $\Delta E$ | 0     | 0.91  | 2.55   | 3.77   | 5.87   | 10.43  | 9.92   | 11.24  | 11.29  |

|    |            |       |       |        |        |        |        |        |        |        |
|----|------------|-------|-------|--------|--------|--------|--------|--------|--------|--------|
| 10 | L*         | 32.73 | 32.46 | 34.59  | 35.1   | 33.51  | 31.93  | 31.07  | 31.21  | 30.75  |
| 10 | a*         | -7.84 | -8.49 | -9.14  | -9.96  | -11.89 | -16.51 | -15.97 | -18.5  | -18.36 |
| 10 | b*         | 0.89  | 0.46  | 0.38   | 0.62   | 1.3    | 1.82   | 1.95   | 2.7    | 3.26   |
| 10 | $\Delta E$ | 0     | 0.82  | 2.33   | 3.19   | 4.14   | 8.76   | 8.37   | 10.92  | 10.96  |
| 11 | L*         | 32.29 | 32.42 | 33.14  | 34.99  | 35.37  | 33.07  | 30.01  | 31.54  | 30.22  |
| 11 | a*         | -7.84 | -8.37 | -9.02  | -9.79  | -10.7  | -13.98 | -15.44 | -16.73 | -16.39 |
| 11 | b*         | 0.87  | 0.5   | 0.44   | 0.36   | 0.74   | 1.25   | 1.8    | 2.14   | 2.74   |
| 11 | $\Delta E$ | 0     | 0.66  | 1.52   | 3.37   | 4.21   | 6.20   | 7.99   | 9.01   | 8.99   |
| 12 | L*         | 32.54 | 33.51 | 35.78  | 35.64  | 34.3   | 34.84  | 33.48  | 33.71  | 34.39  |
| 12 | a*         | -8.19 | -8.61 | -9.82  | -10.67 | -15.01 | -19.27 | -18.61 | -20.41 | -20.83 |
| 12 | b*         | 0.85  | 0.38  | 0.65   | 1.14   | 1.97   | 2.41   | 2.68   | 3.28   | 3.66   |
| 12 | $\Delta E$ | 0     | 1.16  | 3.63   | 3.98   | 7.13   | 11.42  | 10.62  | 12.51  | 13.08  |
| 13 | L*         | 32.29 | 33.44 | 35.52  | 37.42  | 36.3   | 35.45  | 32.82  | 33.72  | 34.72  |
| 13 | a*         | -8.14 | -8.53 | -9.45  | -11.06 | -12.34 | -17.58 | -18.16 | -20.25 | -20.51 |
| 13 | b*         | 0.85  | 0.38  | 0.5    | 0.69   | 1.68   | 1.9    | 2.59   | 3.2    | 3.39   |
| 13 | $\Delta E$ | 0     | 1.30  | 3.50   | 5.90   | 5.87   | 10.01  | 10.18  | 12.42  | 12.86  |
| 14 | L*         | 32.58 | 33.11 | 35.29  | 36.42  | 36.19  | 34.38  | 34.18  | 34.89  | 33.99  |
| 14 | a*         | -7.93 | -8.45 | -9.53  | -10.37 | -13.2  | -18.85 | -20.09 | -20.9  | -20.05 |
| 14 | b*         | 0.78  | 0.39  | 0.2    | 0.76   | 1.27   | 2.08   | 2.64   | 3.03   | 3.59   |
| 14 | $\Delta E$ | 0     | 0.84  | 3.20   | 4.55   | 6.41   | 11.14  | 12.41  | 13.36  | 12.52  |
| 18 | L*         | 32.88 | 33.64 | 34.56  | 34.7   | 33.16  | 33.48  | 34.01  | 33.85  | 33.59  |
| 18 | a*         | -8.12 | -8.77 | -9.45  | -10.55 | -14.09 | -18.47 | -19.02 | -19.8  | -19.12 |
| 18 | b*         | 0.85  | 0.37  | 0.7    | 1.06   | 1.94   | 2.35   | 2.58   | 3.19   | 3.26   |
| 18 | $\Delta E$ | 0     | 1.11  | 2.15   | 3.04   | 6.08   | 10.48  | 11.09  | 11.95  | 11.28  |
| 19 | L*         | 32.26 | 34.86 | 37.35  | 38.44  | 37.31  | 36.03  | 35.13  | 35.68  | 35.83  |
| 19 | a*         | -8.3  | -8.9  | -10.5  | -11.97 | -15.59 | -19.06 | -18.6  | -20.76 | -20.22 |
| 19 | b*         | 0.97  | 0.39  | 0.58   | 0.97   | 2.05   | 2.56   | 2.64   | 3.57   | 3.86   |
| 19 | $\Delta E$ | 0     | 2.73  | 5.56   | 7.19   | 8.93   | 11.51  | 10.82  | 13.18  | 12.77  |
| 20 | L*         | 32.47 | 33.52 | 37.77  | 38.43  | 38.39  | 37.37  | 33.83  | 34.13  | 36.37  |
| 20 | a*         | -8.38 | -9.33 | -10.78 | -12.3  | -14.84 | -20.05 | -18.2  | -20.98 | -20.5  |
| 20 | b*         | 0.85  | 0.75  | 0.4    | 1.02   | 1.93   | 2.24   | 2.62   | 3.8    | 4.46   |
| 20 | $\Delta E$ | 0     | 1.42  | 5.84   | 7.14   | 8.83   | 12.73  | 10.07  | 13.05  | 13.23  |

**Table S3. QUV Accelerated Weathering Tester**

| Sample | Parameter | 0 h   | 300 h | 600 h | 900 h | 1200 h | 1500 h | 1800 h | 2100 h | 2400 h | 2700 h | 3000 h | 3300 h | 3600 h | 3900 h | 4200 h |
|--------|-----------|-------|-------|-------|-------|--------|--------|--------|--------|--------|--------|--------|--------|--------|--------|--------|
| 1      | L*        | 32.27 | 31.53 | 37.75 | 35.50 | 38.77  | 37.99  | 38.00  | 37.99  | 37.49  | 38.44  | 38.46  | 38.73  | 37.9   | 38.61  | 38.62  |
| 1      | a*        | -8.16 | -8.58 | -8.66 | -9.58 | -10.42 | -10.90 | -11.73 | -12.96 | -12.78 | -12.73 | -12.42 | -13.36 | -14    | -13.92 | -13.88 |
| 1      | b*        | 0.81  | 0.18  | -1.10 | -0.29 | -0.50  | 0.60   | 0.63   | 0.78   | 1.44   | 1.03   | 1.43   | 1.12   | 1.33   | 1.65   | 1.72   |
| 1      | ΔE        | 0.00  | 1.06  | 5.82  | 3.70  | 7.01   | 6.35   | 6.75   | 7.47   | 7.00   | 7.68   | 7.54   | 8.30   | 8.13   | 8.61   | 8.59   |
| 2      | L*        | 32.99 | 31.74 | 35.35 | 39.8  | 39.15  | 39.11  | 38.29  | 37.1   | 37.21  | 37.95  | 37.96  | 37.98  | 39.94  | 39.5   | 38.03  |
| 2      | a*        | -8.03 | -8.82 | -8.96 | 10.87 | -10.76 | -11.4  | -12.36 | -12.48 | -12.88 | -13.41 | -13.33 | -12.3  | -13.08 | -12.09 | -13.23 |
| 2      | b*        | 0.61  | 0.02  | -1.33 | -1.54 | -0.19  | 0.23   | 0.7    | 0.16   | 0.93   | 0.93   | 1.11   | 1.16   | 1.39   | 1.53   | 1.84   |
| 2      | ΔE        | 0     | 1.59  | 3.19  | 7.69  | 6.79   | 7.00   | 6.84   | 6.07   | 6.44   | 7.32   | 7.28   | 6.59   | 8.63   | 7.73   | 7.35   |
| 3      | L*        | 32.24 | 32.11 | 33.32 | 34.75 | 37.27  | 37.74  | 38.65  | 38.87  | 38.07  | 38.47  | 38.83  | 39.1   | 39.31  | 39.43  | 39.72  |
| 3      | a*        | -8.11 | -8.40 | -8.86 | -9.24 | -10.00 | -10.59 | -10.91 | -11.80 | -12.52 | -13.6  | -12.85 | -13.3  | -13.63 | -14.11 | -14.18 |
| 3      | b*        | 0.63  | 0.17  | -0.35 | -0.38 | -0.26  | 0.54   | 0.32   | 0.39   | 0.86   | 0.58   | 0.27   | 0.57   | 0.91   | 1.27   | 1.58   |
| 3      | ΔE        | 0.00  | 0.56  | 1.64  | 2.93  | 5.45   | 6.03   | 7.00   | 7.59   | 7.31   | 8.30   | 8.13   | 8.60   | 8.97   | 9.39   | 9.68   |
| 4      | L*        | 32.23 | 32.24 | 33.52 | 34.53 | 38.20  | 37.07  | 37.70  | 38.97  | 37.35  | 38.31  | 38.75  | 38.52  | 39.09  | 38.84  | 38.77  |
| 4      | a*        | -8.24 | -8.26 | -8.35 | -8.88 | -9.33  | -9.77  | -10.05 | -11.92 | -12.45 | -13.06 | -13.21 | -13.39 | -13.37 | -13.69 | -14.05 |
| 4      | b*        | 0.92  | 0.52  | -0.18 | -0.40 | -0.47  | 0.23   | 0.49   | 0.50   | 1.25   | 1.09   | 1.05   | 1.2    | 1.44   | 1.68   | 2.02   |
| 4      | ΔE        | 0.00  | 0.40  | 1.70  | 2.73  | 6.23   | 5.12   | 5.78   | 7.69   | 6.64   | 7.76   | 8.20   | 8.13   | 8.58   | 8.60   | 8.82   |
| 5      | L*        | 33.05 | 31.66 | 32.14 | 33.78 | 38.71  | 37.42  | 39.21  | 39.60  | 37.59  | 37.96  | 37.7   | 38.17  | 36.74  | 39.29  | 39.21  |
| 5      | a*        | -8.10 | -8.67 | -8.58 | -8.51 | -8.67  | -9.14  | -9.45  | -10.28 | -10.34 | -12.05 | -12.16 | -13.45 | -12.61 | -12.36 | -11.83 |
| 5      | b*        | 0.66  | 0.37  | 0.15  | -0.85 | -1.56  | -0.67  | -0.50  | -0.44  | 0.05   | 0.4    | 0.27   | 0.84   | 1.48   | 1.03   | 1.23   |
| 5      | ΔE        | 0.00  | 1.53  | 1.15  | 1.73  | 6.11   | 4.68   | 6.41   | 6.99   | 5.10   | 6.31   | 6.19   | 7.41   | 5.88   | 7.56   | 7.22   |
| 6      | L*        | 32.62 | 32.55 | 32.73 | 33.73 | 39.87  | 36.53  | 38.91  | 41.42  | 38.81  | 39.02  | 39.1   | 38.62  | 39.16  | 39.62  | 39.42  |
| 6      | a*        | -8.12 | -8.15 | -8.30 | -8.26 | -8.23  | -8.78  | -9.57  | -10.42 | -9.98  | -11.74 | -12.17 | -12.7  | -12.37 | -11.57 | -11.3  |
| 6      | b*        | 0.66  | 0.45  | 0.36  | 0.01  | -1.63  | -0.35  | -0.75  | -0.88  | -0.1   | -0.02  | 0.15   | 0.37   | 0.12   | 0.18   | 0.3    |
| 6      | ΔE        | 0.00  | 0.22  | 0.37  | 1.29  | 7.60   | 4.09   | 6.61   | 9.23   | 6.51   | 7.38   | 7.66   | 7.55   | 7.82   | 7.82   | 7.52   |
| 9      | L*        | 32.41 | 32.47 | 33.61 | 40.48 | 43.82  | 38.78  | 39.88  | 40.80  | 40.22  | 40.73  | 40.51  | 39.46  | 39.56  | 39.58  | 39.71  |
| 9      | a*        | -8.27 | -8.32 | -8.40 | -8.50 | -10.31 | -9.97  | -11.29 | -12.49 | -12.53 | -14.6  | -14.23 | -15.12 | -14.36 | -14.27 | -13.88 |
| 9      | b*        | 0.78  | 0.48  | -0.16 | -1.03 | -1.45  | -0.13  | -0.12  | -0.12  | 0.51   | 0.63   | 0.52   | 1.05   | 0.84   | 1.05   | 1.06   |

|    |            |       |       |       |       |        |        |        |        |        |        |        |        |        |        |        |
|----|------------|-------|-------|-------|-------|--------|--------|--------|--------|--------|--------|--------|--------|--------|--------|--------|
| 9  | $\Delta E$ | 0.00  | 0.31  | 1.53  | 8.27  | 11.80  | 6.66   | 8.11   | 9.43   | 8.90   | 10.46  | 10.06  | 9.83   | 9.39   | 9.35   | 9.21   |
| 10 | L*         | 33.01 | 32.02 | 32.97 | 33.75 | 36.98  | 39.94  | 39.71  | 35.42  | 38.68  | 38.99  | 38.22  | 37.53  | 38.68  | 34.58  | 35.9   |
| 10 | a*         | -7.66 | -8.42 | -8.4  | -8.78 | -9.19  | -10.27 | -11.1  | -10.45 | -13.5  | -13.6  | -13.02 | -13.09 | -12.48 | -11.42 | -11.12 |
| 10 | b*         | 0.85  | 0.46  | -0.07 | -0.16 | -0.34  | -0.5   | -0.06  | 0.39   | 0.83   | 0.74   | 1.08   | 1.11   | 0.99   | 2.62   | 2.19   |
| 10 | $\Delta E$ | 0     | 1.31  | 1.18  | 1.68  | 4.42   | 7.53   | 7.59   | 3.72   | 8.14   | 8.43   | 7.48   | 7.07   | 7.44   | 4.44   | 4.70   |
| 11 | L*         | 32.29 | 31.96 | 32.03 | 32.79 | 38.91  | 34.92  | 37.19  | 38.13  | 39.62  | 39.75  | 39.44  | 39.15  | 39.62  | 39.86  | 37.19  |
| 11 | a*         | -7.84 | -8.13 | -8.25 | -8.23 | -8.25  | -9.09  | -9.51  | -9.92  | -10.27 | -11.77 | -12.35 | -12.65 | -12.22 | -11.97 | -12.5  |
| 11 | b*         | 0.87  | 0.55  | 0.41  | 0.02  | -1.55  | -0.19  | -0.42  | -0.04  | -0.16  | 0.13   | 0.35   | 0.44   | 0.51   | 0.72   | 0.82   |
| 11 | $\Delta E$ | 0.00  | 0.54  | 0.67  | 1.06  | 7.06   | 3.10   | 5.34   | 6.27   | 7.79   | 8.46   | 8.47   | 8.39   | 8.55   | 8.62   | 6.76   |
| 12 | L*         | 32.54 | 32.57 | 36.23 | 38.66 | 40.66  | 40.35  | 40.42  | 39.72  | 39.58  | 40.49  | 40.1   | 39.25  | 39.51  | 39.22  | 39.14  |
| 12 | a*         | -8.19 | -8.42 | -8.61 | -9.84 | -10.92 | -12.01 | -12.44 | -14.12 | -14.09 | -14.85 | -14.11 | -15.12 | -15.17 | -14.96 | -15.4  |
| 12 | b*         | 0.85  | 0.57  | -0.78 | -0.86 | -0.50  | 0.25   | 0.61   | 1.03   | 1.11   | 0.86   | 0.9    | 2.19   | 2.46   | 2.09   | 2.32   |
| 12 | $\Delta E$ | 0.00  | 0.36  | 4.06  | 6.57  | 8.67   | 8.71   | 8.96   | 9.31   | 9.19   | 10.37  | 9.60   | 9.74   | 9.99   | 9.59   | 9.88   |
| 13 | L*         | 32.29 | 32.57 | 34.30 | 40.04 | 40.15  | 38.38  | 37.93  | 39.46  | 39.97  | 41.2   | 41.02  | 40.76  | 41.2   | 40.91  | 40.7   |
| 13 | a*         | -8.14 | -8.28 | -8.38 | -9.01 | -9.93  | -10.51 | -10.98 | -13.02 | -12.88 | -12.99 | -12.31 | -12.58 | -13.53 | -13.38 | -13.71 |
| 13 | b*         | 0.85  | 0.51  | -0.36 | -1.47 | -0.98  | 0.35   | 0.69   | 0.73   | 0.51   | 0.74   | 0.97   | 1.8    | 1.99   | 2.41   | 2.54   |
| 13 | $\Delta E$ | 0.00  | 0.46  | 2.36  | 8.14  | 8.27   | 6.55   | 6.32   | 8.67   | 9.03   | 10.15  | 9.68   | 9.61   | 10.48  | 10.21  | 10.23  |
| 14 | L*         | 32.58 | 32.90 | 34.31 | 36.97 | 38.33  | 37.58  | 37.63  | 38.44  | 38.95  | 39.42  | 39.35  | 41.02  | 42     | 40.95  | 41.2   |
| 14 | a*         | -7.93 | -8.17 | -8.43 | -8.98 | -9.35  | -10.50 | -11.58 | -12.44 | -13.34 | -14.83 | -15.22 | -13.13 | -13.33 | -14.25 | -14.16 |
| 14 | b*         | 0.78  | 0.35  | -0.48 | -1.38 | -1.08  | 0.24   | 0.78   | 0.36   | 0.69   | 1.19   | 1.35   | 2.25   | 2.62   | 2.21   | 2.55   |
| 14 | $\Delta E$ | 0.00  | 0.59  | 2.20  | 5.00  | 6.21   | 5.65   | 6.23   | 7.41   | 8.36   | 9.72   | 9.97   | 10.02  | 11.01  | 10.59  | 10.78  |
| 18 | L*         | 32.88 | 32.18 | 34.74 | 32.90 | 36.06  | 37.47  | 36.99  | 38.17  | 37.83  | 38.46  | 38.74  | 39.07  | 39.3   | 38.33  | 38.5   |
| 18 | a*         | -8.12 | -8.53 | -8.66 | -9.76 | -9.63  | -10.85 | -11.69 | -12.83 | -14.11 | -14.92 | -13.8  | -13.35 | -13.48 | -14.55 | -14.74 |
| 18 | b*         | 0.85  | 0.45  | -0.18 | 0.12  | 0.14   | 0.91   | 1.05   | 0.86   | 1.06   | 1.33   | 0.83   | 1.61   | 1.93   | 2.3    | 2.5    |
| 18 | $\Delta E$ | 0.00  | 0.90  | 2.19  | 1.80  | 3.59   | 5.34   | 5.45   | 7.08   | 7.77   | 8.81   | 8.16   | 8.14   | 8.43   | 8.55   | 8.84   |
| 19 | L*         | 32.71 | 33.81 | 38.02 | 39.89 | 40.56  |        |        |        |        |        |        |        |        |        |        |
| 19 | a*         | -8.1  | -8.58 | -9.21 | 10.25 | -11.22 |        |        |        |        |        |        |        |        |        |        |
| 19 | b*         | 0.93  | 0.27  | -1    | -0.32 | 0.31   |        |        |        |        |        |        |        |        |        |        |
| 19 | $\Delta E$ | 0     | 1.37  | 5.76  | 7.60  | 8.47   |        |        |        |        |        |        |        |        |        |        |
| 20 | L*         | 32.47 | 33.22 | 41.46 | 42.03 | 41.59  | 43.72  | 40.81  | 42.18  | 41.35  | 42.29  | 42.05  | 42.8   | 43.25  | 42.88  | 43.41  |
| 20 | a*         | -8.38 | -8.63 | -8.79 | 10.16 | -10.90 | -13.13 | -13.46 | -15.26 | -16.72 | -17.67 | -17.32 | -16.72 | -15.97 | -15.98 | -15.45 |

|    |            |      |      |       |       |       |       |      |       |       |       |       |       |       |       |       |
|----|------------|------|------|-------|-------|-------|-------|------|-------|-------|-------|-------|-------|-------|-------|-------|
| 20 | b*         | 0.85 | 0.54 | -1.64 | -1.29 | -0.33 | 0.52  | 1.15 | 0.83  | 1.16  | 1.5   | 1.79  | 2.9   | 3.29  | 3.21  | 3.62  |
| 20 | $\Delta E$ | 0.00 | 0.85 | 9.34  | 9.96  | 9.54  | 12.22 | 9.77 | 11.90 | 12.19 | 13.53 | 13.14 | 13.43 | 13.41 | 13.10 | 13.32 |
